# Supplementary material for: Fine and Predictable Tuning of TALEN Gene Editing Targeting for Improved T Cell Adoptive Immunotherapy
Source: PubMed Central journal article supplement — Mol Ther Nucleic Acids. 2017 Oct 14;9:312–21. doi: 10.1016/j.omtn.2017.10.005 (PMC5684446; doi:10.1016/j.omtn.2017.10.005), 2017-10-14
Supplement: mmc1.pdf [file mmc1.pdf]

**OMTN, Volume 9**

## **Supplemental Information**

**Fine and Predictable Tuning of TALEN**

**Gene Editing Targeting for Improved T Cell**

**Adoptive Immunotherapy**

**Anne-Sophie Gautron, Alexandre Juillerat, Valérie Guyot, Jean-Marie Filhol, Emilie Dessez, Aymeric Duclert, Philippe Duchateau, and Laurent Poirot**

## Supplementary tables

### Sequences of off-site targets predicted in silico

| Offtarget name | left_Sequence_With_Mismatches | right_Sequence_With_Mismatches | type |
|----------------|-------------------------------|--------------------------------|------|
| T3v1OS1        | tctcttAgatAtgcAA              | AGgcTgatcaaagTga               | RR   |
| T3v1OS2        | tacctctgAgAAAcca              | gcTcagatcCCagaga               | LR   |
| T3v1OS3        | tctcttAAatctgcAc              | CcgcaTCtcCaagaga               | RR   |
| T3v1OS4        | taccCAGgtggggccT              | AgTcccTGcagaggta               | LL   |
| T3v1OS5        | taccGcGAtggggcca              | TcTcaTCtcaaagaga               | LR   |
| T3v1OS6        | taActAtgCAGggcca              | ATgcTccacaAaggta               | LL   |
| T3v1OS7        | tctcttgaGctTcAG               | ATgcaTatcaTagaga               | RR   |
| T3v1OS8        | tGcctcAgtgAggTca              | CcAcagatTaaTgaga               | LR   |
| T3v1OS9        | tacctctgtgTgAAcT              | tggcccTAcagagTGA               | LL   |
| T3v1OS10       | tctcttAaActTcAc               | tgTccccTcTgTggta               | RL   |
| T3v1OS11       | tctctCAGaGctgccc              | CggccccacaTaCTta               | RL   |
| T3v1OS12       | tacctctgCAGgAcCa              | gcgcaCTGcaaCgaga               | LR   |
| T3v1OS13       | tcAcCGtgatctgAgc              | tggccAcGcagGTgta               | RL   |
| T3v1OS14       | tGccGctgGggAgcca              | GAgGcccaGagaggta               | LL   |

| Offtarget name | left_Sequence_With_Mismatches | right_Sequence_With_Mismatches | type   | type   |
|----------------|-------------------------------|--------------------------------|--------|--------|
| TRAC/T3v2OS1   | tGcctctgCggAgcT               | TgccccCTagaggta                | PD1T3L | PD1T3L |
| TRAC/T3v2OS2   | tcCctGGgatctgcA               | TgcagatcaaagaTa                | PD1T3R | PD1T3R |
| TRAC/T3v2OS3   | tGcctcATggggcc                | atCtctgtgTgTcCa                | PD1T3L | TRAC_L |
| TRAC/T3v2OS4   | tGccActgtggggAc               | ggcccTGGTgaggCa                | PD1T3L | PD1T3L |
| TRAC/T3v2OS5   | tctcaActgAtacaG               | TTcaTCtcaGagaga                | TRAC_R | PD1T3R |
| TRAC/T3v2OS6   | tctcttAgatAtgcA               | GgcTgatcaaagTga                | PD1T3R | PD1T3R |
| TRAC/T3v2OS7   | ttgtAccacaAatat               | cTTagGtcTCTgaga                | TRAC_L | PD1T3R |
| TRAC/T3v2OS8   | tctcAGAGaCctAAg               | atafTtgtggTacaa                | PD1T3R | TRAC_L |
| TRAC/T3v2OS9   | tctcAGAGaCctAAg               | atafTtgtggTacaa                | PD1T3R | TRAC_L |
| TRAC/T3v2OS10  | tctcAGAGaCctAAg               | atafTtgtggTacaa                | PD1T3R | TRAC_L |
| TRAC/T3v2OS11  | ttgtAccacaAatat               | cTTagGtcTCTgaga                | TRAC_L | PD1T3R |
| TRAC/T3v2OS12  | tctcAGAGaCctAAg               | atafTtgtggTacaa                | PD1T3R | TRAC_L |
| TRAC/T3v2OS13  | tAtcttgaActgAg                | CTccccTcagTggta                | PD1T3R | PD1T3L |
| TRAC/T3v2OS14  | ttgtccAaAagaCGt               | cAcaTatcaTagaga                | TRAC_L | PD1T3R |
| TRAC/T3v2OS15  | tacctctCtAggAcc               | TAcTgatTGAagaga                | PD1T3L | PD1T3R |
| TRAC/T3v2OS16  | taccAcAgAggggAc               | cgTagCtcaaagTTa                | PD1T3L | PD1T3R |
| TRAC/T3v2OS17  | tGccActgtggggCAc              | TgTagatcaGaTaga                | PD1T3L | PD1T3R |
| TRAC/T3v2OS18  | tctAtttgaActgAA               | GGatTtgtTggacaa                | PD1T3R | TRAC_L |
| TRAC/T3v2OS19  | ttAGTcAacagatat               | cgTagTtTaaagaga                | TRAC_L | PD1T3R |
| TRAC/T3v2OS20  | tctcttAatcAgAg                | TTTagatcaTagaAa                | PD1T3R | PD1T3R |
| TRAC/T3v2OS21  | tctcttAAatctgcA               | cgcaTCtcCaagaga                | PD1T3R | PD1T3R |
| TRAC/T3v2OS22  | tGcctctAAgAgAcc               | cAcagatcTaagTga                | PD1T3L | PD1T3R |
| TRAC/T3v2OS23  | tGcctctgtgggCcc               | cTTAaatcaGagaga                | PD1T3L | PD1T3R |
| TRAC/T3v2OS24  | tacctcGAaggAAc                | TTcaAatcaaagaga                | PD1T3L | PD1T3R |
| TRAC/T3v2OS25  | tGcctcAgtgAggTc               | cAcagatTaaTgaga                | PD1T3L | PD1T3R |

**List of oligonucleotides used for NGS sequencing to analyze off-target cleavages**

|             |                                                                  |
|-------------|------------------------------------------------------------------|
| T3v1OS1M1   | CCATCTCATCCCTGCGTGTCTCCGACTCAGACGAGTGCGTGCTGAGCAGAACAGTCATGG     |
| T3v1OS1M15  | CCATCTCATCCCTGCGTGTCTCCGACTCAGATACGACGTAGCTGAGCAGAACAGTCATGG     |
| T3v1OS2M2   | CCATCTCATCCCTGCGTGTCTCCGACTCAGACGCTCGACAACGGCAGGAACCTCCATTAGC    |
| T3v1OS2M16  | CCATCTCATCCCTGCGTGTCTCCGACTCAGTCACGTAACGGCAGGAACCTCCATTAGC       |
| T3v1OS3M3   | CCATCTCATCCCTGCGTGTCTCCGACTCAGAGACGCACTCAGGATCATACTCTGCCACGC     |
| T3v1OS3M17  | CCATCTCATCCCTGCGTGTCTCCGACTCAGCGTCTAGTACAGGATCATACTCTGCCACGC     |
| T3v1OS4M4   | CCATCTCATCCCTGCGTGTCTCCGACTCAGAGCACTGTAGTCAGCTTAGGGCCTTTTCTCA    |
| T3v1OS4M18  | CCATCTCATCCCTGCGTGTCTCCGACTCAGTCTACGTAGCTCAGCTTAGGGCCTTTTCTCA    |
| T3v1OS5M5   | CCATCTCATCCCTGCGTGTCTCCGACTCAGATCAGACACGGCTAGGCAAGGGAGTATGGG     |
| T3v1OS5M19  | CCATCTCATCCCTGCGTGTCTCCGACTCAGTGTACTACTCGCTAGGCAAGGGAGTATGGG     |
| T3v1OS6M6   | CCATCTCATCCCTGCGTGTCTCCGACTCAGATATCGCGAGAGAACCTCAGAGAGCTACTGC    |
| T3v1OS6M20  | CCATCTCATCCCTGCGTGTCTCCGACTCAGACGACTACAGAGAACCTCAGAGAGCTACTGC    |
| T3v1OS7M7   | CCATCTCATCCCTGCGTGTCTCCGACTCAGCGTGTCTCTAACAGTGATTGTTTCTAGGTGGC   |
| T3v1OS7M21  | CCATCTCATCCCTGCGTGTCTCCGACTCAGCGTAGACTAGACAGTGATTGTTTCTAGGTGGC   |
| T3v1OS8M8   | CCATCTCATCCCTGCGTGTCTCCGACTCAGCTCGCGTGTCTCCATCACCTCTTGAGCATTATCA |
| T3v1OS8M22  | CCATCTCATCCCTGCGTGTCTCCGACTCAGTACGAGTATGTCCATCACCTCTTGAGCATTATCA |
| T3v1OS9M9   | CCATCTCATCCCTGCGTGTCTCCGACTCAGTAGTATCAGCACAGGAAAGAAACACACTGTTGG  |
| T3v1OS9M23  | CCATCTCATCCCTGCGTGTCTCCGACTCAGTACTCTCGTGACAGGAAAGAAACACACTGTTGG  |
| T3v1OS10M10 | CCATCTCATCCCTGCGTGTCTCCGACTCAGTCTCTATGCGAGGCGTGACTTCAATCATCCA    |
| T3v1OS10M24 | CCATCTCATCCCTGCGTGTCTCCGACTCAGTAGAGACGAGAGGCGTGACTTCAATCATCCA    |
| T3v1OS11M11 | CCATCTCATCCCTGCGTGTCTCCGACTCAGTGATACGTCTCGTATCCCAGCGACTAAGC      |
| T3v1OS11M25 | CCATCTCATCCCTGCGTGTCTCCGACTCAGTCGTCGCTCGCGTATCCCAGCGACTAAGC      |
| T3v1OS12M12 | CCATCTCATCCCTGCGTGTCTCCGACTCAGTACTGAGCTACGGGAGCTTCACTGAGTCAC     |
| T3v1OS12M26 | CCATCTCATCCCTGCGTGTCTCCGACTCAGACATACGCGTCGGGAGCTTCACTGAGTCAC     |
| T3v1OS13M13 | CCATCTCATCCCTGCGTGTCTCCGACTCAGCATAGTAGTGCCCTTCTAGCCATGAATGA      |
| T3v1OS13M27 | CCATCTCATCCCTGCGTGTCTCCGACTCAGACGCGAGTATCCCCTTCTAGCCATGAATGA     |
| T3v1OS14M14 | CCATCTCATCCCTGCGTGTCTCCGACTCAGCGAGAGATACTACGTCATAACACTGCGCGGCC   |
| T3v1OS14M28 | CCATCTCATCCCTGCGTGTCTCCGACTCAGACTACTATGTTACGTCATAACACTGCGCGGCC   |
| T3v1OS1R    | CCTATCCCCTGTGTGCCTTGGCAGTCTCAGGAGTGTCACTCTGGAGGGCA               |
| T3v1OS2R    | CCTATCCCCTGTGTGCCTTGGCAGTCTCAGAGGCTTGGCTAGATCTGGGA               |
| T3v1OS3R    | CCTATCCCCTGTGTGCCTTGGCAGTCTCAGAGCTGAATTTTCTCGGGCA                |
| T3v1OS4R    | CCTATCCCCTGTGTGCCTTGGCAGTCTCAGCAGTCTCTCCCTCACTTGG                |
| T3v1OS5R    | CCTATCCCCTGTGTGCCTTGGCAGTCTCAGGACTCTACTCCTGGATCCCCA              |
| T3v1OS6R    | CCTATCCCCTGTGTGCCTTGGCAGTCTCAGACCACCTCTGTTTGTCTCAG               |
| T3v1OS7R    | CCTATCCCCTGTGTGCCTTGGCAGTCTCAGAGCAGTCATCTCCTGGAGCC               |
| T3v1OS8R    | CCTATCCCCTGTGTGCCTTGGCAGTCTCAGTCATTTGCAGCAACACAGATGG             |
| T3v1OS9R    | CCTATCCCCTGTGTGCCTTGGCAGTCTCAGGGCACAAACCTTCTCAAGTAGA             |
| T3v1OS10R   | CCTATCCCCTGTGTGCCTTGGCAGTCTCAGCTGAAAGTCACCCCTGCACC               |
| T3v1OS11R   | CCTATCCCCTGTGTGCCTTGGCAGTCTCAGCTTATACCCCGAACCTGCA                |
| T3v1OS12R   | CCTATCCCCTGTGTGCCTTGGCAGTCTCAGTGGAGCCTCACCATAGGGAC               |
| T3v1OS13R   | CCTATCCCCTGTGTGCCTTGGCAGTCTCAGTCTCCATCCTGCCATGAGC                |
| T3v1OS14R   | CCTATCCCCTGTGTGCCTTGGCAGTCTCAGGGTTGGAGTTGCTTCTCGGA               |
| T3v1MIDF25  | CCATCTCATCCCTGCGTGTCTCCGACTCAGTCGTCGCTCGGACAGAGATGCCGGTCACCATTC  |
| T3v1MIDF26  | CCATCTCATCCCTGCGTGTCTCCGACTCAGTCGTCGCTCGGACAGAGATGCCGGTCACCATTC  |
| T3v1MIDR    | CCTATCCCCTGTGTGCCTTGGCAGTCTCAGGGACAACGCCACCTTACCTGC              |

|                   |                                               |
|-------------------|-----------------------------------------------|
| TRAC/T3v2OS1F     | AAGACTCGGCAGCATCTCCATTGAGGCATATTCGGGCAGG      |
| TRAC/T3v2OS1-1R   | GCGATCGTCACTGTTCTCCAGGCCCTAACTCAAACCCACA      |
| TRAC/T3v2OS2-F    | AAGACTCGGCAGCATCTCCATGACTTTGTAGCTCCCTCTGC     |
| TRAC/T3v2OS2-R    | GCGATCGTCACTGTTCTCCATAACCTAGGCACATCCTCCC      |
| TRAC/T3v2OS3-1-F  | AAGACTCGGCAGCATCTCCATGCACCACAGAACTGGGTGA      |
| TRAC/T3v2OS3-1-R  | GCGATCGTCACTGTTCTCCAGGCTTTAATCCAGGATGACTGC    |
| TRAC/T3v2OS4-1-F  | AAGACTCGGCAGCATCTCCATTCTTAGCACAGGGCCTTGG      |
| TRAC/T3v2OS4-1-R  | GCGATCGTCACTGTTCTCCAGACCTGGCTCGTTTCTGTGA      |
| TRAC/T3v2OS5-1-F  | AAGACTCGGCAGCATCTCCAAAACCCCTGGCCACATCTTCA     |
| TRAC/T3v2OS5-1-R  | GCGATCGTCACTGTTCTCCAACCTCATGGTCGCAAAGTGG      |
| TRAC/T3v2OS6-1-F  | AAGACTCGGCAGCATCTCCAAGTTAGGGGAGGCAGGGAGA      |
| TRAC/T3v2OS6-1-R  | GCGATCGTCACTGTTCTCCAACAGCCCCGCTTCTATCCC       |
| TRAC/T3v2OS7-1-F  | AAGACTCGGCAGCATCTCCATGAAAAATGAGGAAGGGTGCC     |
| TRAC/T3v2OS7-1-R  | GCGATCGTCACTGTTCTCCATCCATGACAACTCTGAGTTAGCA   |
| TRAC/T3v2OS8-2-F  | AAGACTCGGCAGCATCTCCATCCTATATAATGCCAGATTAGC    |
| TRAC/T3v2OS8-2-R  | GCGATCGTCACTGTTCTCCATGAAAGATGAGGAAGAGTGC      |
| TRAC/T3v2OS13-F   | AAGACTCGGCAGCATCTCCAATGGACATAAATTTAAGCTAGCAGC |
| TRAC/T3v2OS13-R   | GCGATCGTCACTGTTCTCCAGCCCTTACACATGTTCTTGCA     |
| TRAC/T3v2OS14-F   | AAGACTCGGCAGCATCTCCATGGGGGAGTTACAGAAAAGCC     |
| TRAC/T3v2OS14-R   | GCGATCGTCACTGTTCTCCACTGATGGAATTACAGGCATAGCA   |
| TRAC/T3v2OS15-1-F | AAGACTCGGCAGCATCTCCAGCAAGTCAGTCATTTGTCAGGG    |
| TRAC/T3v2OS15-1-R | GCGATCGTCACTGTTCTCCATACTATTCCGGGAGCGCAGGA     |
| TRAC/T3v2OS16-1-F | AAGACTCGGCAGCATCTCCACCCCTTCTCTTCTTCCCTCC      |
| TRAC/T3v2OS16-1-R | GCGATCGTCACTGTTCTCCACATGGTGAGTACTCAGGCCA      |
| TRAC/T3v2OS17-1-F | AAGACTCGGCAGCATCTCCAGCCATAAAATGCCAAAGCC       |
| TRAC/T3v2OS17-1-R | GCGATCGTCACTGTTCTCCAAGAGGTCAGAGTCTGGGCA       |
| TRAC/T3v2OS18-1-F | AAGACTCGGCAGCATCTCCATTGACTCTGTGCCAGGAACC      |
| TRAC/T3v2OS18-1-R | GCGATCGTCACTGTTCTCCAAGGAGAGGAGAGGACCTGGA      |
| TRAC/T3v2OS19-1-F | AAGACTCGGCAGCATCTCCACAGAAAGAGAGAGGAGAAAGAAAGA |
| TRAC/T3v2OS19-1-R | GCGATCGTCACTGTTCTCCACATGGAACCTTTCTGTTCTCC     |
| TRAC/T3v2OS20-1-F | AAGACTCGGCAGCATCTCCAGCCTTTCTCCTGAGCTGTGA      |
| TRAC/T3v2OS20-1-R | GCGATCGTCACTGTTCTCCAGCTGCAACAATGGTTTACTTTGC   |
| TRAC/T3v2OS21-1-F | AAGACTCGGCAGCATCTCCAAGCACTTCACTTAACTCAGGATCA  |
| TRAC/T3v2OS21-1-R | GCGATCGTCACTGTTCTCCAAAATGAGATGATACCTTTCTGACC  |
| TRAC/T3v2OS22-1-F | AAGACTCGGCAGCATCTCCAGGCATCCTTCCATCAGCACA      |
| TRAC/T3v2OS22-1-R | GCGATCGTCACTGTTCTCCATGCACAATTCTTTTTAACACACGC  |
| TRAC/T3v2OS23-F   | AAGACTCGGCAGCATCTCCATGTCTAGATGGGAATGGTTTGC    |
| TRAC/T3v2OS23-R   | GCGATCGTCACTGTTCTCCAGCCATGATTTTCTTCCATAGTCA   |
| TRAC/T3v2OS25-2-F | AAGACTCGGCAGCATCTCCATGTATGTTTGTACCTTTAGCCAAC  |
| TRAC/T3v2OS25-2-R | GCGATCGTCACTGTTCTCCAACCTGAAGCACTGTTACCATAG    |

**Total number of reads and total number of events detected, Figure 2C**

| <b>Non-transfected</b> |        |               |                            |
|------------------------|--------|---------------|----------------------------|
| Target                 | # EvtS | # total reads | estimated indels frequency |
| PD-1                   | 0      | 5898          | < 0.000170                 |
| off-site #1            | 0      | 11234         | < 0.000089                 |
| off-site #2            | 0      | 1364          | < 0.000733                 |
| off-site #3            | 0      | 15178         | < 0.000066                 |
| off-site #4            | 0      | 15043         | < 0.000066                 |
| off-site #5            | 0      | 10077         | < 0.000099                 |
| off-site #6            | 0      | 33787         | < 0.000030                 |
| off-site #7            | 0      | 10778         | < 0.000093                 |
| off-site #8            | 0      | 4133          | < 0.000242                 |
| off-site #9            | 3      | 12554         | 0.000239                   |
| off-site #10           | 0      | 13595         | < 0.000074                 |
| off-site #11           | 0      | 13689         | < 0.000073                 |
| off-site #12           | 21     | 9066          | 0.002316                   |
| off-site #13           | 0      | 5675          | < 0.000176                 |
| off-site #14           | 0      | 2399          | < 0.000417                 |
| <b>T3v1 PD-1</b>       |        |               |                            |
| Target                 | # EvtS | # total reads | estimated indels frequency |
| PD-1                   | 3388   | 3678          | 0.921153                   |
| off-site #1            | 0      | 10714         | < 0.000093                 |
| off-site #2            | 0      | 1990          | < 0.000503                 |
| off-site #3            | 0      | 9304          | < 0.000107                 |
| off-site #4            | 0      | 15664         | < 0.000064                 |
| off-site #5            | 0      | 12330         | < 0.000081                 |
| off-site #6            | 2      | 43075         | 0.000046                   |
| off-site #7            | 0      | 12146         | < 0.000082                 |
| off-site #8            | 0      | 3488          | < 0.000287                 |
| off-site #9            | 244    | 20926         | 0.011660                   |
| off-site #10           | 0      | 15634         | < 0.000064                 |
| off-site #11           | 0      | 16972         | < 0.000059                 |
| off-site #12           | 10     | 10185         | 0.000982                   |
| off-site #13           | 0      | 2126          | < 0.000470                 |
| off-site #14           | 3      | 3889          | 0.000771                   |

The efficiency of T3v1 PD-1 TALEN-mediated gene processing was analyzed by high-throughput DNA sequencing analysis using 454 sequencing system. The indels frequency is estimated as followed: total number of events/total number of reads.

**Total number of reads and total number of events detected, Figure 3C**

| <b>Non-transfected</b> |        |               |                            |
|------------------------|--------|---------------|----------------------------|
| Target                 | # EvtS | # total reads | estimated indels frequency |
| PD-1                   | 1      | 4356          | 0.00022957                 |
| off-site #9            | 1      | 14080         | 7.1023E-05                 |
| <b>T3v2 PD-1</b>       |        |               |                            |
| Target                 | # EvtS | # total reads | estimated indels frequency |
| PD-1                   | 4141   | 4559          | 0.90831323                 |
| off-site #9            | 0      | 11223         | < 0.000089                 |
| <b>T3v3 PD-1</b>       |        |               |                            |
| Target                 | # EvtS | # total reads | estimated indels frequency |
| PD-1                   | 4010   | 4780          | 0.83891213                 |
| off-site #9            | 1      | 4691          | 0.00021317                 |

The efficiency of T3v2 and T3v3 PD-1 TALEN-mediated gene processing was analyzed by high-throughput DNA sequencing analysis using 454 sequencing system. The indels frequency is estimated as followed: total number of events/total number of reads.

**Total number of reads and total number of events detected, Figure 4A**

| <b>Non-transfected</b> |        |               |                            |
|------------------------|--------|---------------|----------------------------|
| Target                 | # EvtS | # total reads | estimated indels frequency |
| PD-1                   | 14     | 9703          | 0.001443                   |
| TRAC                   | 5      | 15331         | 0.000326                   |
| off-site #1            | 1      | 6727          | 0.000149                   |
| off-site #2            | 1      | 9173          | 0.000109                   |
| off-site #3            | 0      | 9167          | < 0.000109                 |
| off-site #4            | 6      | 11614         | 0.000517                   |
| off-site #5            | 0      | 4584          | < 0.000218                 |
| off-site #6            | 0      | 4157          | < 0.000241                 |
| off-site #7            | 4      | 16037         | 0.000249                   |
| off-site #8            | 0      | 16669         | < 0.00006                  |
| off-site #13           | 5      | 15147         | 0.000330                   |
| off-site #14           | 0      | 8797          | < 0.000114                 |
| off-site #15           | 698    | 15287         | 0.045660                   |
| off-site #16           | 1      | 18109         | 0.000055                   |
| off-site #17           | 17     | 9861          | 0.001724                   |
| off-site #18           | 2      | 6052          | 0.000330                   |
| off-site #19           | 3      | 11415         | 0.000263                   |
| off-site #20           | 4      | 8167          | 0.000490                   |
| off-site #21           | 0      | 2065          | < 0.000484                 |
| off-site #22           | 4      | 11239         | 0.000356                   |
| off-site #23           | 8      | 10088         | 0.000793                   |
| off-site #24           | 1      | 5271          | 0.000190                   |
| off-site #25           | 45     | 14415         | 0.003122                   |
| <b>T3v2 PD-1/TRAC</b>  |        |               |                            |
| Target                 | # EvtS | # total reads | estimated indels frequency |
| PD-1                   | 5539   | 7059          | 0.784672                   |
| TRAC                   | 9      | 6190          | 0.001454                   |
| off-site #1            | 6      | 12799         | 0.000469                   |
| off-site #2            | 248    | 8371          | 0.029626                   |
| off-site #3            | 1      | 10716         | 0.000093                   |
| off-site #4            | 0      | 4330          | < 0.000231                 |
| off-site #5            | 0      | 4167          | < 0.000537                 |
| off-site #6            | 7      | 13040         | 0.000537                   |
| off-site #7            | 1      | 14157         | 0.000071                   |
| off-site #8            | 7      | 16926         | 0.000414                   |
| off-site #13           | 1      | 12087         | 0.000083                   |
| off-site #14           | 736    | 15230         | 0.048326                   |
| off-site #15           | 1      | 15038         | 0.000066                   |
| off-site #16           | 24     | 12413         | 0.001933                   |
| off-site #17           | 1      | 5793          | 0.000173                   |
| off-site #18           | 1      | 12288         | 0.000081                   |
| off-site #19           | 3      | 8184          | 0.000367                   |
| off-site #20           | 1      | 2804          | 0.000357                   |
| off-site #21           | 2      | 12478         | 0.000160                   |
| off-site #22           | 6      | 8545          | 0.000702                   |
| off-site #23           | 1      | 7096          | 0.000141                   |
| off-site #24           | 18     | 12156         | 0.001481                   |
| off-site #25           | 3933   | 8911          | 0.441365                   |

In depth characterization of the molecular events generated by T3v2 PD-1 TALEN in combination with TRAC TALEN by high-throughput DNA sequencing analysis using Illumina method. The indels frequency is estimated as followed: total number of events/total number of reads.

**Total number of reads and total number of events detected, Figure 4C**

| <b>Non-transfected</b> |        |               |                            |
|------------------------|--------|---------------|----------------------------|
| Target                 | # EvtS | # total reads | estimated indels frequency |
| PD-1                   | 265    | 78440         | 0.003378378                |
| TRAC                   | 412    | 184080        | 0.002238157                |
| v2OS3                  | 6      | 95819         | 6.26181E-05                |
| v1OS9                  | 51     | 135931        | 0.00037519                 |
| <b>T3v1 PD-1/TRAC</b>  |        |               |                            |
| Target                 | # EvtS | # total reads | estimated indels frequency |
| PD-1                   | 60009  | 67419         | 0.890090331                |
| TRAC                   | 61559  | 100579        | 0.612046252                |
| v2OS3                  | 2553   | 97569         | 0.026166098                |
| v1OS9                  | 1762   | 128743        | 0.013686181                |
| <b>T3v2 PD-1/TRAC</b>  |        |               |                            |
| Target                 | # EvtS | # total reads | estimated indels frequency |
| PD-1                   | 65292  | 71167         | 0.917447693                |
| TRAC                   | 72287  | 113150        | 0.63885992                 |
| v2OS3                  | 1520   | 101328        | 0.01500079                 |
| v1OS9                  | 73     | 148720        | 0.000490855                |
| <b>T3v3 PD-1/TRAC</b>  |        |               |                            |
| Target                 | # EvtS | # total reads | estimated indels frequency |
| PD-1                   | 80010  | 92730         | 0.862827564                |
| TRAC                   | 53601  | 107114        | 0.500410777                |
| v2OS3                  | 747    | 104308        | 0.007161483                |
| v1OS9                  | 58     | 129894        | 0.000446518                |
| <b>T3v4 PD-1/TRAC</b>  |        |               |                            |
| Target                 | # EvtS | # total reads | estimated indels frequency |
| PD-1                   | 54533  | 73740         | 0.739530784                |
| TRAC                   | 52627  | 89848         | 0.585733684                |
| v2OS3                  | 11     | 133406        | 8.24551E-05                |
| v1OS9                  | 47     | 140867        | 0.000333648                |

In depth characterization of the molecular events generated by T3v1, T3v2, T3v3 or T3v4 PD-1 TALEN in combination with TRAC TALEN by high-throughput DNA sequencing analysis using Illumina method. The indels frequency is estimated as followed: total number of events/total number of reads.
